# Supplementary material for: Fluorescent Phthalocyanine-Encapsulated Bovine Serum Albumin Nanoparticles: Their Deployment as Therapeutic Agents in the NIR Region
Source: MDPI journal article supplement (doi:10.3390/molecules26154679), 2021-08-02
Supplement: s1 [file s1]

# Fluorescent phthalocyanine-encapsulated bovine serum albumin nanoparticles: their deployment as therapeutic agents in the NIR region

Raluca Borlan<sup>1,2</sup>, Daria Stoia<sup>2</sup>, Luiza Gaina<sup>3</sup>, Andreea Campu<sup>2</sup>, Gabriel Marc<sup>4</sup>, Maria Perde-Schrepler<sup>5</sup>, Mihaela Silion<sup>6</sup>, Dana Maniu<sup>1,2</sup>, Monica Focsan<sup>2,✉</sup>, Simion Astilean<sup>1,2,✉</sup>.

<sup>1</sup> Biomolecular Physics Department, Faculty of Physics, Babes-Bolyai University, Cluj-Napoca, Cluj, Romania;

<sup>2</sup> Nanobiophotonics and Laser Microspectroscopy Centre, Interdisciplinary Research Institute on Bio-Nano-Sciences, Babes-Bolyai University, Cluj-Napoca, Cluj, Romania;

<sup>3</sup> The Research Centre on Fundamental and Applied Heterochemistry, Department of Chemistry, Faculty of Chemistry and Chemical Engineering, Babes-Bolyai University, Cluj-Napoca, Cluj, Romania;

<sup>4</sup> Department of Pharmaceutical Chemistry, Faculty of Pharmacy, 'Iuliu Hațieganu' University of Medicine and Pharmacy, 41 Victor Babes, Street, Cluj-Napoca 400012, Romania

<sup>5</sup> Department of Radiobiology and Tumor Biology, Oncology Institute Prof. Dr. Ion Chiricuta, Cluj-Napoca, Cluj, Romania;

<sup>6</sup> Romanian Academy of Sciences Petru Poni Institute of Macromolecular Chemistry Romanian Acad, Adv Res Ctr Bionanoconjugates & Biopolymers, Petru Poni Inst Macromol Chem, Iasi, Romania;

✉ Corresponding author

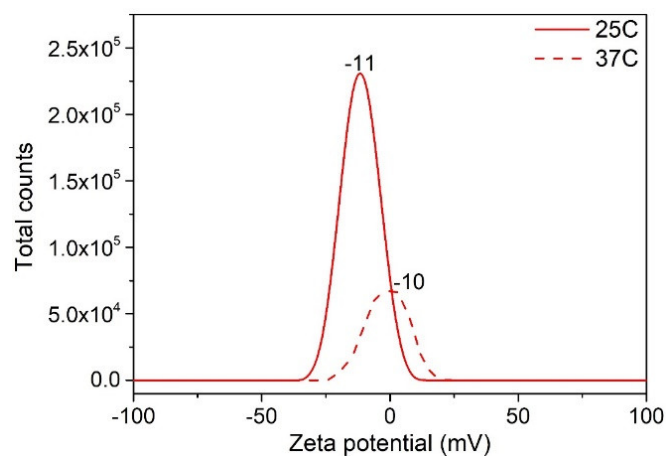

**Figure S1.** Zeta potential measurements of the BSA&phthaloNH<sub>2</sub> NPs at 25 °C (solid line) and at 37 °C (dashed line).

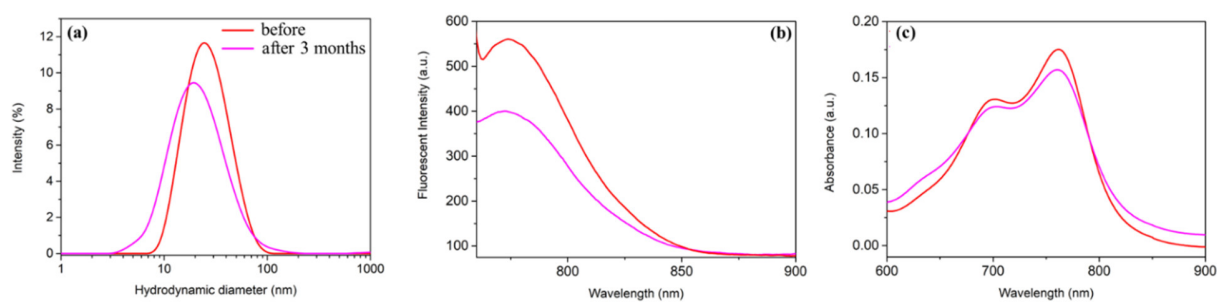

**Figure S2.** (a) DLS, (b) fluorescence and (c) absorption spectra of the BSA&phthaloNH<sub>2</sub> NPs just after development (red) and after 3 months of storage (pink).

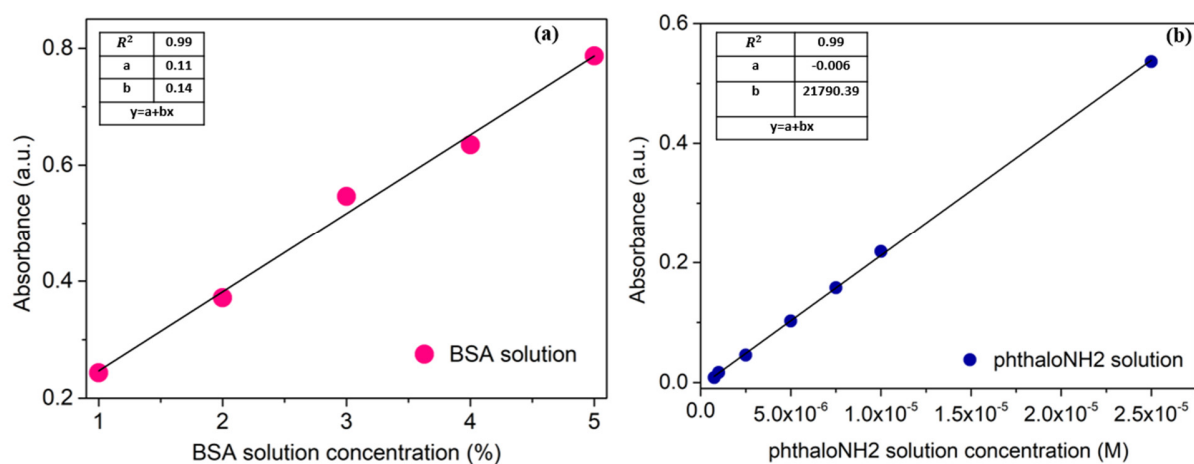

**Figure S3.** The calibration curves for different concentrations of (a) free BSA (b) phthaloNH<sub>2</sub> dye solution.

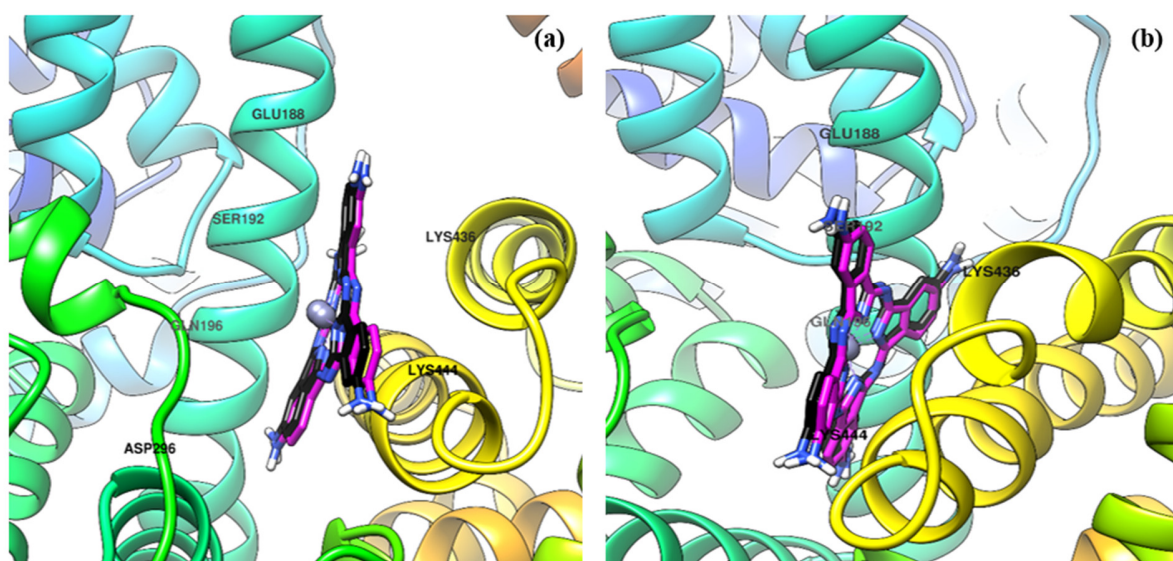

**Figure S4.** View from both sides of the poses predicted for phthalonH<sub>2</sub> into the two Sudlow's site I by **(a)** AutoDock (carbon atoms in magenta) and **(b)** AutoDock vina (carbon atoms in black). Some amino acid labels were depicted for a better comprehension.

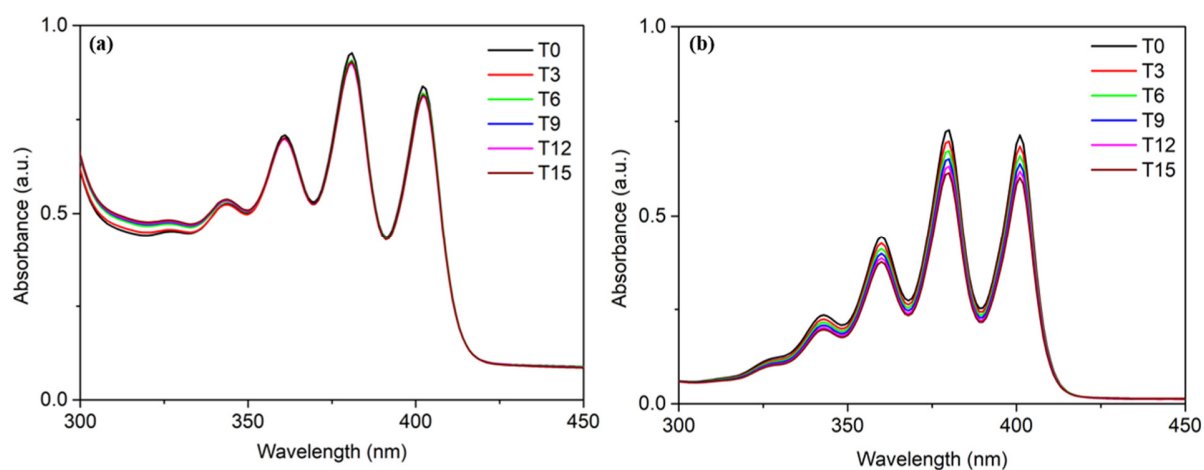

**Figure S5.** Degradation of ABDA during 15 minutes of irradiation in the presence of **(a)** BSA&phthalonH<sub>2</sub> NPs and **(b)** free phthalonH<sub>2</sub>.

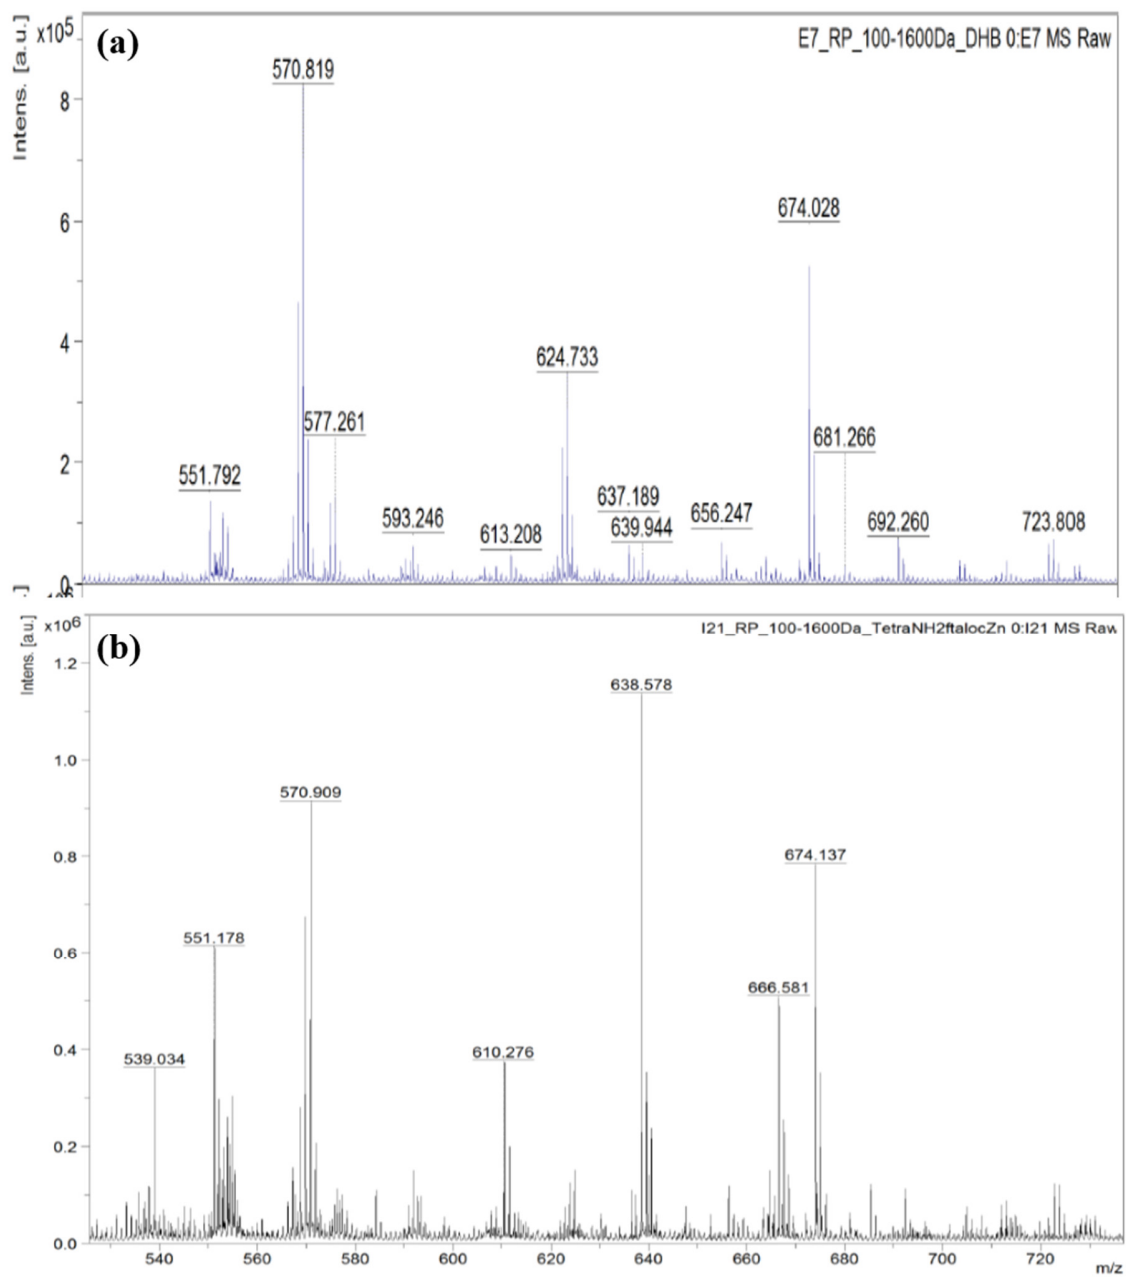

**Figure S6.** Mass spectra (MALDI-TOF-MS): (a) the DHB (2,5-dihydroxybenzoic acid) matrix and (b) Zn (II)-2,9,16,23-tetraaminophthalocyanine ( $m/z = 638.578$ ) in the presence of the DHB matrix.
